# Supplementary material for: Unexpected diversity in the host-generalist oribatid miteParaleius leontonychus(Oribatida, Scheloribatidae) phoretic on Palearctic bark beetles
Source: PeerJ journal article supplement (doi:10.7717/peerj.9710), 2020-09-11
Supplement: Fig_S1.pdf [file Fig_S1.pdf]

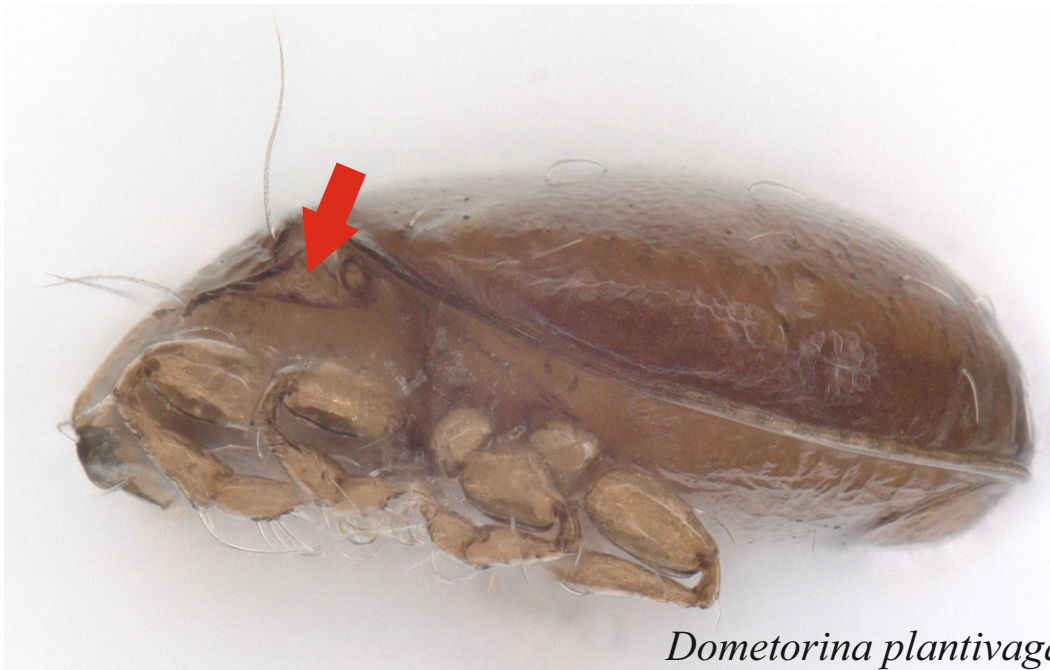

*Dometorina plantivaga*

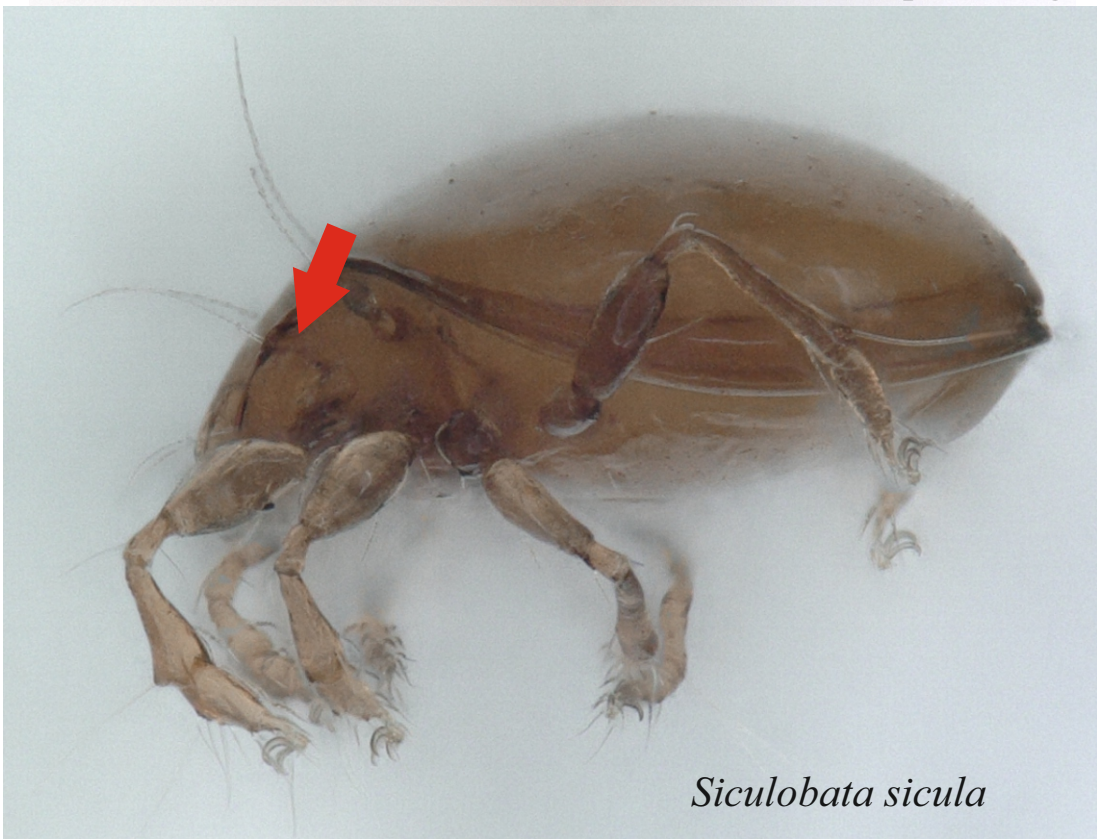

*Siculobata sicula*

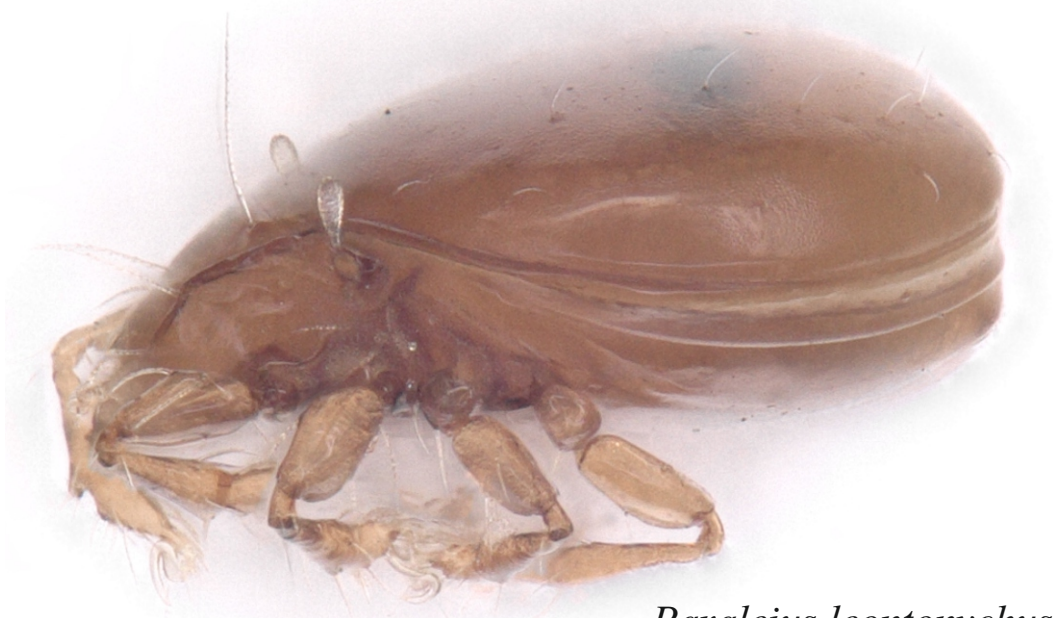

*Paraleius leontonychus*
