# Supplementary material for: Unexpected diversity in the host-generalist oribatid mite Paraleius leontonychus (Oribatida, Scheloribatidae) phoretic on Palearctic bark beetles
Source: PeerJ. 2020 Sep 11;8:e9710. doi: 10.7717/peerj.9710 (PMC7489242; doi:10.7717/peerj.9710)
Supplement: Supplemental Information 2 [file peerj-08-9710-s002.xlsx]

## Sheet: Tabelle1
gene	ML model	number of substitution rate categories	invariable sites (I)	Gamma-shape parameter (G)
COI-2	HKY+G+I	4	0.572	0.838
D3-28S	K80+I	1	0.765
18S	GTR+I	1	0.907
