# Supplementary material for: Unexpected diversity in the host-generalist oribatid mite Paraleius leontonychus (Oribatida, Scheloribatidae) phoretic on Palearctic bark beetles
Source: PeerJ. 2020 Sep 11;8:e9710. doi: 10.7717/peerj.9710 (PMC7489242; doi:10.7717/peerj.9710)
Supplement: Supplemental Information 3 [file peerj-08-9710-s003.xlsx]

## Sheet: Tabelle1
Ultrametric tree(s) for GMYC and bGMYC
gene	site model	clock model		Prior	MCMC
COI-2	HKY+G+I	relaxed clock log normal		birth death	chain length 10 million generations; sampled every 1000; pre-burnin
Multi-locus species tree analysis*
gene	site model	clock model		Prior	MCMC
COI-2	HKY+G+I	relaxed clock log normal		birth death	2 independent runs; chain length 2 billion generations; sampled every 5.000; pre-burnin 5000
D3-28S	HKY+I	relaxed clock log normal		birth death
18S	GTR+I	relaxed clock log normal		birth death
*Resulting log-files were evaluated in Tracer and all treefiles were combined using LogCombiner, after discarding an initial burn-in of 30% of trees and resampling every 1000th tree.
