# Supplementary material for: Unexpected diversity in the host-generalist oribatid mite Paraleius leontonychus (Oribatida, Scheloribatidae) phoretic on Palearctic bark beetles
Source: PeerJ. 2020 Sep 11;8:e9710. doi: 10.7717/peerj.9710 (PMC7489242; doi:10.7717/peerj.9710)
Supplement: Supplemental Information 4 — (1) Values for COI-2 gene are given in gray boxes and for 18S (upper value), respectively, 28S-D3 (lower value) in white boxes. (2) n/c = not possible to estimate evolutionary distances because of insufficient sample size. G1-6 refer to the six detected mitochondrial Paraleius groups; Dometorina (D.) plantivaga and Siculobata (S.) sicula represent outgroup species. Red values indicate no interspecific genetic differences. [file peerj-08-9710-s004.xlsx]

## Sheet: Tabelle1
	Pairwise distances between groups/species								Pairwise distances within groups/species
	G1	G2	G3	G4	G5	G6	S. sicula	D. plantivaga	COI-2	18S	28S-D3
G1		0.004 / 0.003	0.003 / 0.003	0.002 / 0.003	0.005 / 0.016	0.005 / 0.010	0.008 / 0.004	0.039 / 0.086	0.047	0	0
G2	0.186		0.003 / 0.000	0.003 / 0.000	0.007 / 0.019	0.006 / 0.013	0.009 / 0.007	0.040 / 0.086	0.002	0	0
G3	0.156	0.165		0.003 / 0.000	0.006 / 0.019	0.005 / 0.013	0.009 / 0.007	0.038 / 0.086	n/c	n/c	n/c
G4	0.175	0.186	0.127		0.007 / 0.019	0.006 / 0.013	0.007 / 0.007	0.039 / 0.086	0.024	0	0
G5	0.174	0.196	0.172	0.168		0.001 / 0.022	0.011 / 0.018	0.042 / 0.102	0.000	0	0
G6	0.177	0.194	0.189	0.165	0.158		0.010 / 0.013	0.041 / 0.091	0.005	0	0.003
S. sicula	0.215	0.238	0.220	0.216	0.224	0.208		0.038 / 0.090	0.010	0	0.002
D. plantivaga	0.256	0.248	0.242	0.249	0.252	0.247	0.237		0.005	0	0
